# Supplementary material for: Daily interruption of sedation in critically ill children: study protocol for a randomized controlled trial
Source: PubMed Central journal article supplement (PMC3928607; doi:10.1186/1745-6215-15-55), 2014-02-13

## Appendix 1. Sedation protocol, basic scheme

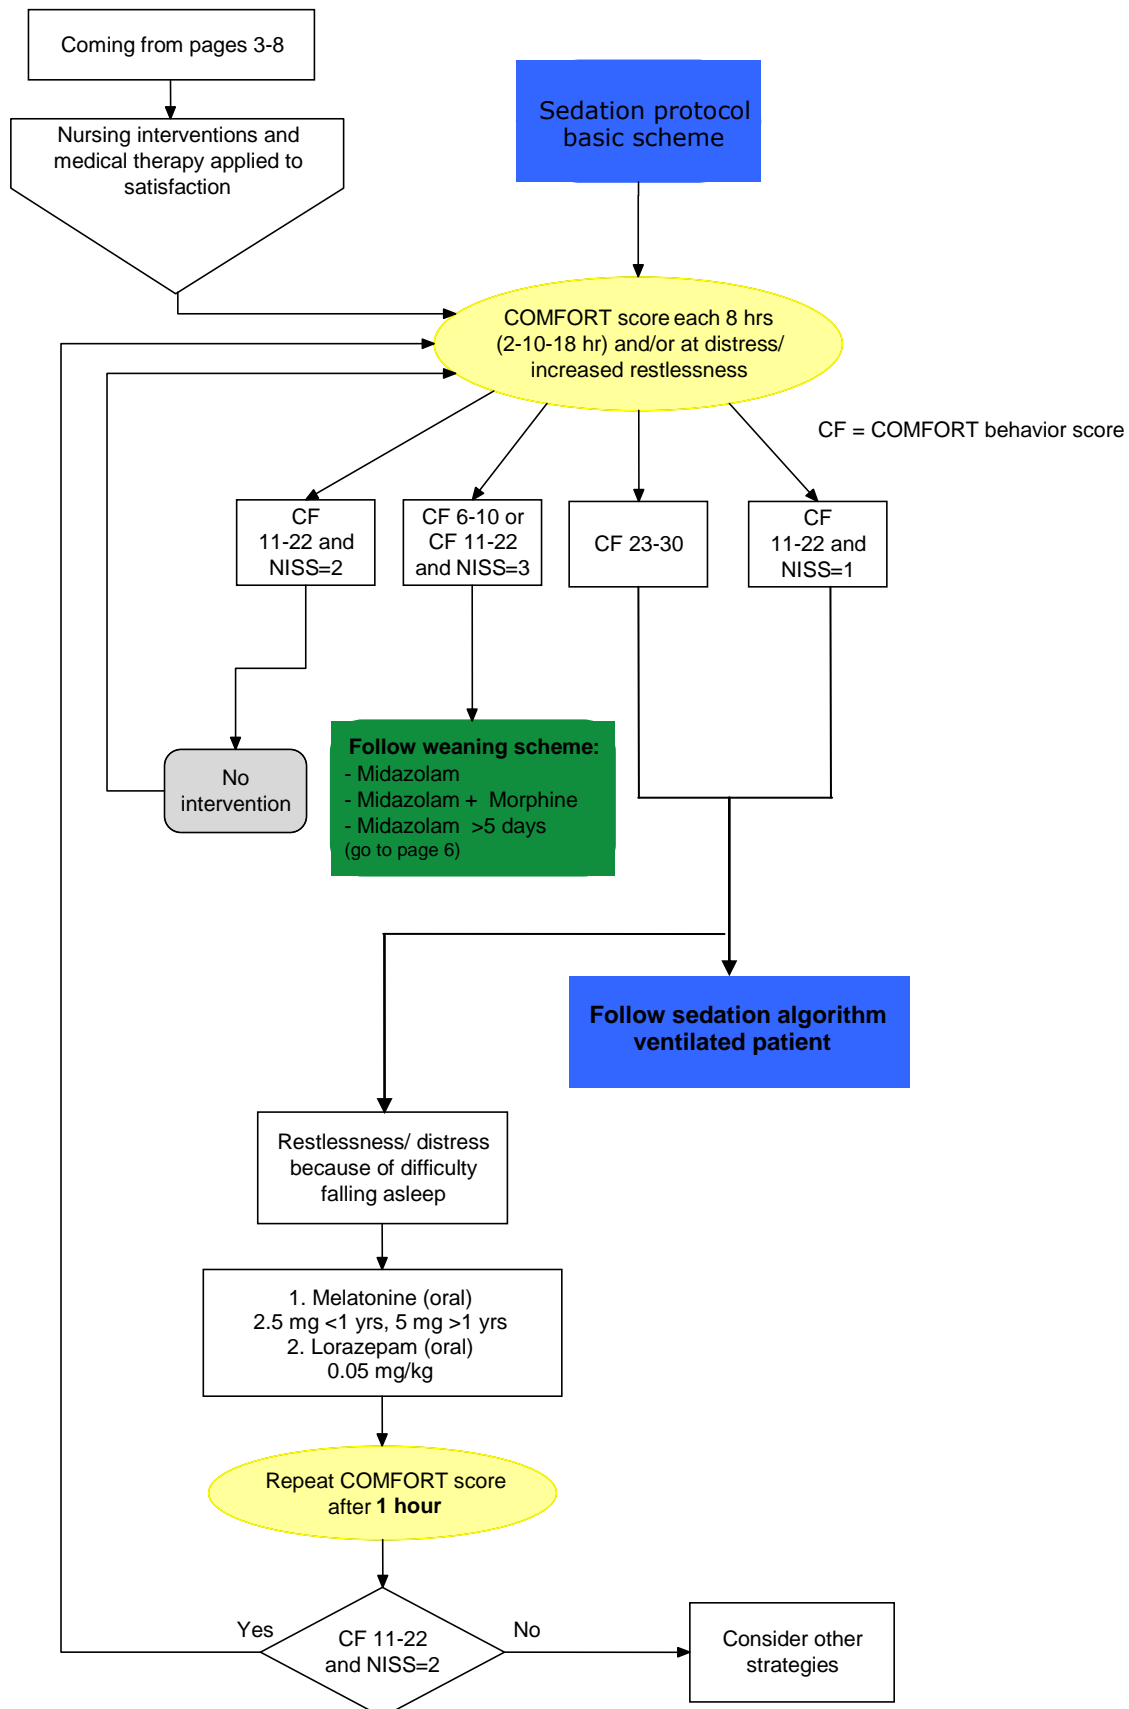

## Appendix 2. Sedation protocol, increasing decision tree

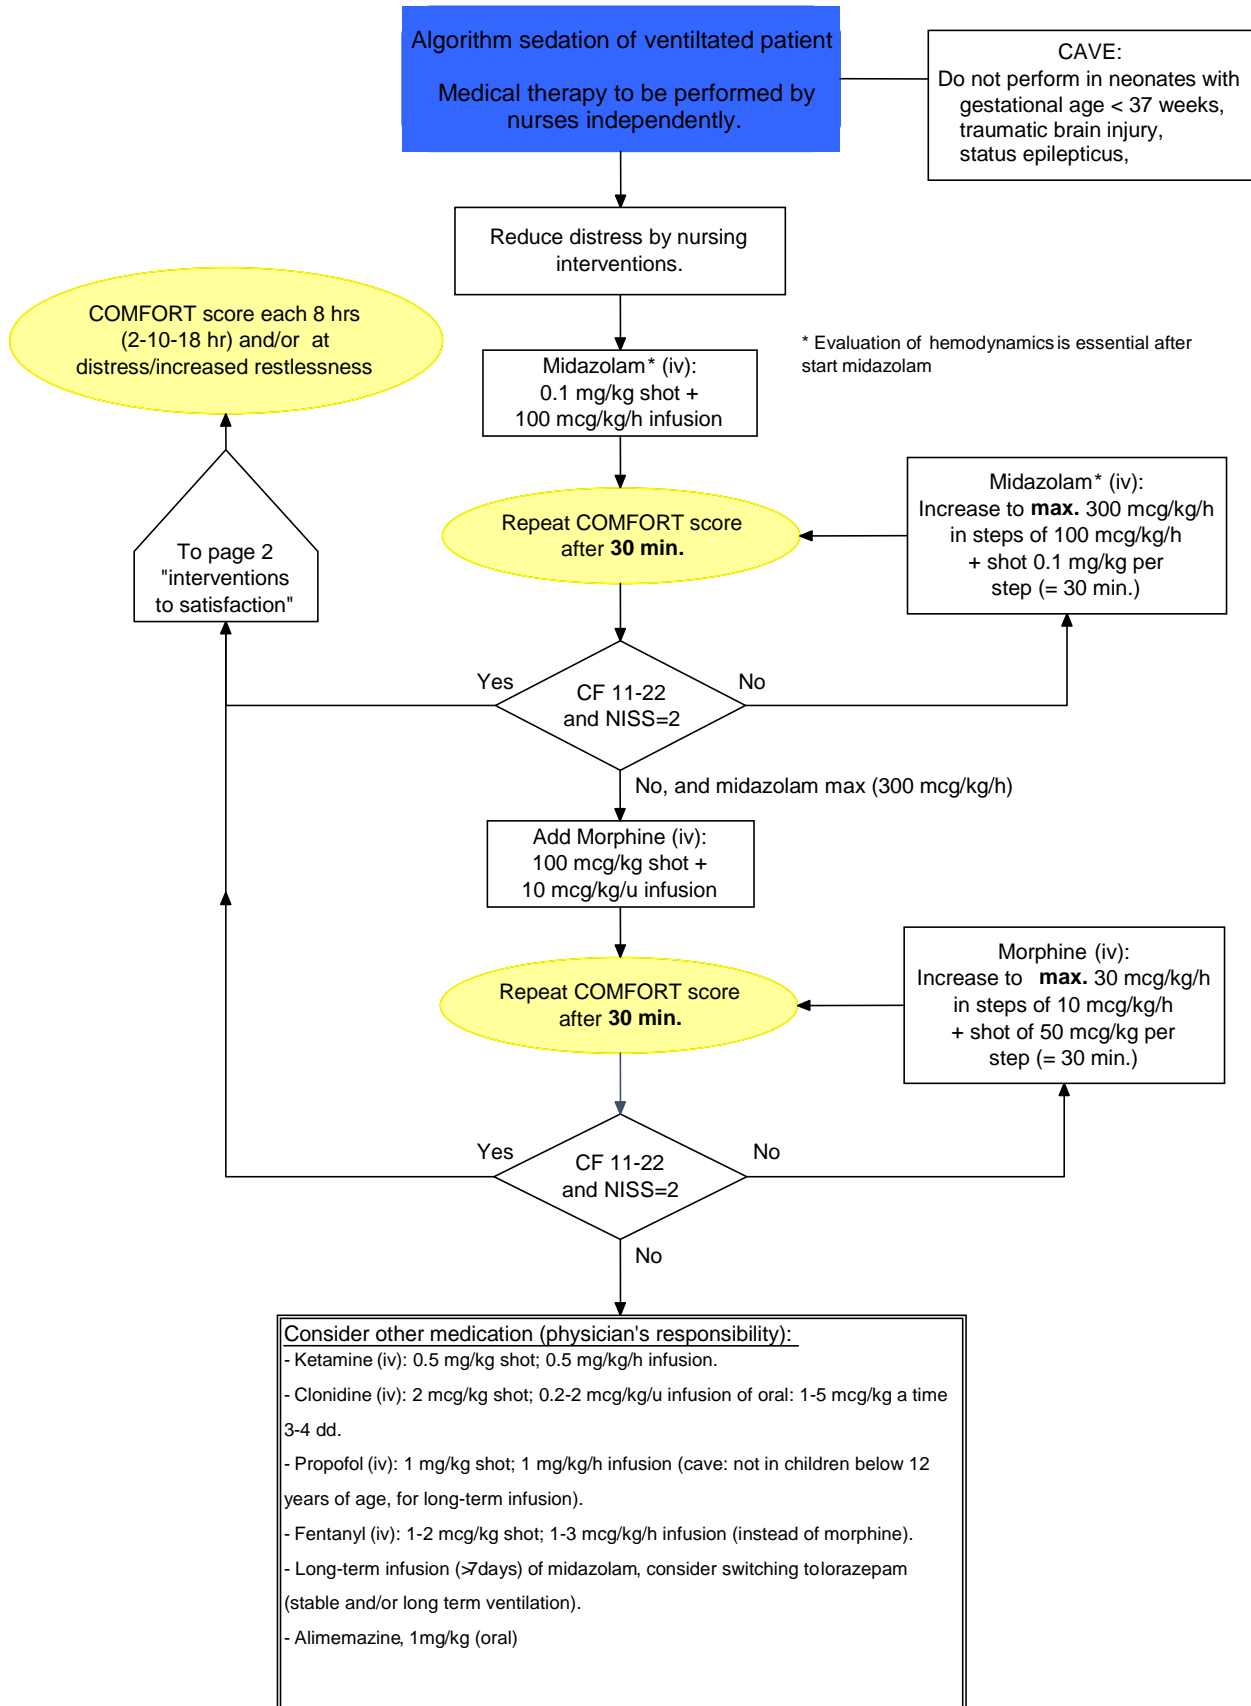

Supplement: 1745-6215-15-55-S1.pdf [file 1745-6215-15-55-S1.pdf]
